# Supplementary material
Source: PubMed Central journal article supplement (PMC3741237)
Supplement: SD1.pdf [file SD1.pdf]

SUPPLEMENTAL TABLE 1  
West Nile virus (WNV) isolates used in extended phylogenetic analyses

| GenBank accession no. | Year | Location     | Host species                | Citation |
|-----------------------|------|--------------|-----------------------------|----------|
| AF196835              | 1999 | New York     | Chilean flamingo            | 38       |
| AF206518              | 1999 | Connecticut  | <i>Culex pipiens</i>        | 39       |
| AF404754              | 2000 | New Jersey   | <i>Cx. pipiens</i>          | 40       |
| AY712945              | 2003 | Texas        | Mourning dove               | 15       |
| AY712946              | 2003 | Texas        | Blue jay                    | 15       |
| AY712947              | 2003 | Texas        | Blue jay                    | 15       |
| AY712948              | 2003 | Texas        | <i>Cx. quinquefasciatus</i> | 15       |
| DQ080051              | 2003 | Arizona      | <i>Cx. tarsalis</i>         | 41       |
| DQ080052              | 2003 | Arizona      | <i>Cx. tarsalis</i>         | 41       |
| DQ080053              | 2003 | Arizona      | <i>Cx. tarsalis</i>         | 41       |
| DQ080054              | 2003 | California   | <i>Cx. quinquefasciatus</i> | 41       |
| DQ080055              | 2003 | California   | <i>Cx. tarsalis</i>         | 41       |
| DQ080056              | 2003 | California   | <i>Cx. tarsalis</i>         | 41       |
| DQ080057              | 2003 | California   | Crow                        | 41       |
| DQ080058              | 2003 | California   | Crow                        | 41       |
| DQ080059              | 2003 | California   | Yellow-billed magpie        | 41       |
| DQ080060              | 2004 | Mexico       | Raven                       | 41       |
| DQ080061              | 2004 | Louisiana    | Northern cardinal           | 41       |
| DQ080062              | 2002 | Louisiana    | Mosquito                    | 41       |
| DQ080063              | 2003 | Mexico       | Pigeon                      | 41       |
| DQ080064              | 2003 | Mexico       | Coot                        | 41       |
| DQ080065              | 2003 | Mexico       | Grackle                     | 41       |
| DQ080066              | 2003 | Mexico       | Cormorant                   | 41       |
| DQ080067              | 2003 | Mexico       | Green heron                 | 41       |
| DQ080068              | 2003 | Mexico       | Blue heron                  | 41       |
| DQ080069              | 2003 | Mexico       | Horse                       | 41       |
| DQ080070              | 2003 | Mexico       | Grackle                     | 41       |
| DQ080071              | 2002 | Florida      | Horse                       | 41       |
| DQ080072              | 2001 | Florida      | Catbird                     | 41       |
| DQ164186              | 2002 | New York     | American crow               | 15       |
| DQ164187              | 2002 | New York     | American crow               | 15       |
| DQ164188              | 2003 | New York     | American crow               | 15       |
| DQ164189              | 2003 | New York     | American crow               | 15       |
| DQ164190              | 2003 | New York     | American crow               | 15       |
| DQ164191              | 2003 | New York     | American crow               | 15       |
| DQ164192              | 2003 | New York     | American crow               | 15       |
| DQ164193              | 2002 | New York     | American crow               | 15       |
| DQ164194              | 2001 | New York     | <i>Cx. pipiens</i>          | 15       |
| DQ164195              | 2002 | New York     | <i>Cx. pipiens</i>          | 15       |
| DQ164196              | 2002 | Georgia      | Human                       | 15       |
| DQ164197              | 2002 | Georgia      | Human                       | 15       |
| DQ164198              | 2002 | Texas        | Human                       | 15       |
| DQ164199              | 2003 | Texas        | Human                       | 15       |
| DQ164200              | 2002 | Indiana      | Human                       | 15       |
| DQ164201              | 2004 | Arizona      | Human                       | 15       |
| DQ164202              | 2002 | Ohio         | Human                       | 15       |
| DQ164203              | 2003 | Colorado     | Magpie                      | 15       |
| DQ164204              | 2003 | Colorado     | Red-tailed hawk             | 15       |
| DQ164205              | 2002 | Texas        | Human                       | 15       |
| DQ164206              | 2004 | Texas        | Blue jay                    | 15       |
| DQ431693              | 2003 | Texas        | Human                       | 42       |
| DQ431694              | 2003 | Texas        | Human                       | 42       |
| DQ431695              | 2003 | Illinois     | Human                       | 42       |
| DQ431696              | 2003 | Wisconsin    | Human                       | 42       |
| DQ431697              | 2003 | Florida      | Human                       | 42       |
| DQ431698              | 2003 | Florida      | Human                       | 42       |
| DQ431699              | 2003 | Florida      | Human                       | 42       |
| DQ431700              | 2004 | California   | Human                       | 42       |
| DQ431701              | 2004 | Colorado     | Human                       | 42       |
| DQ431702              | 2004 | Colorado     | Human                       | 42       |
| DQ431703              | 2004 | Colorado     | Human                       | 42       |
| DQ431704              | 2004 | Colorado     | Human                       | 42       |
| DQ431705              | 2004 | North Dakota | Human                       | 42       |
| DQ431706              | 2004 | New Mexico   | Human                       | 42       |
| DQ431707              | 2004 | New Mexico   | Human                       | 42       |
| DQ431708              | 2004 | California   | Human                       | 42       |
| DQ431709              | 2004 | California   | Human                       | 42       |
| DQ431710              | 2004 | California   | Human                       | 42       |
| DQ431711              | 2004 | Arizona      | Human                       | 42       |
| DQ431712              | 2004 | Arizona      | Human                       | 42       |

(continued)

SUPPLEMENTAL TABLE 1  
Continued

| GenBank accession no. | Year | Location    | Host species                | Citation |
|-----------------------|------|-------------|-----------------------------|----------|
| GQ507472              | 2003 | California  | Human                       | 11       |
| GQ507473              | 2004 | California  | Human                       | 11       |
| GQ507474              | 2004 | California  | Human                       | 11       |
| GQ507475              | 2005 | California  | Human                       | 11       |
| GQ507476              | 2005 | California  | Human                       | 11       |
| GQ507477              | 2005 | California  | Human                       | 11       |
| GQ507478              | 2005 | California  | Human                       | 11       |
| GQ507480              | 2005 | California  | Human                       | 11       |
| GQ507483              | 2007 | California  | Human                       | 11       |
| GQ507484              | 2007 | California  | Human                       | 11       |
| GU827998              | 2002 | Texas       | Blue jay                    | 43       |
| GU827999              | 2003 | Texas       | Blue jay                    | 43       |
| GU828000              | 2003 | Texas       | Blue jay                    | 43       |
| GU828001              | 2003 | Texas       | <i>Cx. quinquefasciatus</i> | 43       |
| GU828002              | 2003 | Texas       | <i>Cx. quinquefasciatus</i> | 43       |
| GU828003              | 2003 | Texas       | Mourning Dove               | 43       |
| GU828004              | 2003 | Texas       | Blue jay                    | 43       |
| HM488202              | 2007 | New York    | Crow                        |          |
| HM488203              | 2008 | New York    | Crow                        |          |
| HM488206              | 2008 | New York    | Crow                        |          |
| HM488238              | 2008 | New York    | Crow                        |          |
| HM488245              | 2008 | New York    | Crow                        |          |
| JF415914              | 2005 | Texas       | <i>Cx. quinquefasciatus</i> | 29       |
| JF415915              | 2006 | Texas       | Common grackle              | 29       |
| JF415916              | 2006 | Texas       | Northern mockingbird        | 29       |
| JF415917              | 2007 | Texas       | Blue jay                    | 29       |
| JF415918              | 2007 | Texas       | Blue jay                    | 29       |
| JF415919              | 2007 | Texas       | <i>Aedes albopictus</i>     | 29       |
| JF415920              | 2007 | Texas       | Blue jay                    | 29       |
| JF415921              | 2008 | Texas       | Blue jay                    | 29       |
| JF415922              | 2009 | Texas       | <i>Cx. quinquefasciatus</i> | 29       |
| JF415923              | 2009 | Texas       | <i>Cx. quinquefasciatus</i> | 29       |
| JF415924              | 2009 | Texas       | Blue jay                    | 29       |
| JF415925              | 2009 | Texas       | <i>Ae. albopictus</i>       | 29       |
| JF415926              | 2009 | Texas       | <i>Cx. quinquefasciatus</i> | 29       |
| JF415927              | 2009 | Texas       | <i>Ae. albopictus</i>       | 29       |
| JF415928              | 2009 | Texas       | <i>Cx. quinquefasciatus</i> | 29       |
| JF415929              | 2005 | Texas       | Blue jay                    | 29       |
| JF415930              | 2006 | Texas       | <i>Cx. quinquefasciatus</i> | 29       |
| JF488087              | 2004 | Connecticut | <i>Cx. pipiens</i>          |          |
| JF488089              | 2004 | Connecticut | <i>Cx. restuans</i>         |          |
| JF488090              | 2004 | Connecticut | <i>Cx. pipiens</i>          |          |
| JF488095              | 2009 | New York    | Crow                        |          |
| JF488096              | 2009 | New York    | Crow                        |          |
| JF703161              | 2004 | California  | <i>Cx. tarsalis</i>         | 44       |
| JF703162              | 2003 | California  | <i>Cx. tarsalis</i>         | 44       |
| JF703163              | 2005 | California  | <i>Cx. tarsalis</i>         | 44       |
| JF703164              | 2003 | California  | <i>Cx. tarsalis</i>         | 44       |
| JF920731              | 2007 | Connecticut | <i>Cx. pipiens</i>          |          |
| JF920745              | 2007 | Connecticut | <i>Cx. pipiens</i>          |          |
| JF920747              | 2008 | Connecticut | <i>Cx. salinarius</i>       |          |
| JF920754              | 2008 | Connecticut | <i>Cx. pipiens</i>          |          |
| JF920758              | 2009 | Connecticut | <i>Culiseta melanura</i>    |          |
| JF920759              | 2009 | Connecticut | <i>Cx. pipiens</i>          |          |
| JF920760              | 2009 | Connecticut | <i>Cx. pipiens</i>          |          |
| JX015515              | 2005 | Texas       | <i>Cx. tarsalis</i>         | 35       |
| JX015516              | 2007 | Texas       | <i>Cx. tarsalis</i>         | 35       |
| JX015517              | 2008 | Texas       | <i>Cx. tarsalis</i>         | 35       |
| JX015518              | 2008 | Mexico      | <i>Cx. quinquefasciatus</i> | 35       |
| JX015519              | 2009 | Texas       | <i>Cx. quinquefasciatus</i> | 35       |
| JX015520              | 2009 | Mexico      | <i>Cx. quinquefasciatus</i> | 35       |
| JX015521              | 2009 | Texas       | <i>Cx. tarsalis</i>         | 35       |
| JX015522              | 2010 | Texas       | <i>Cx. tarsalis</i>         | 35       |
| JX015523              | 2010 | Texas       | <i>Cx. tarsalis</i>         | 35       |
